# Supplementary material
Source: PubMed Central journal article supplement (PMC5746468)
Supplement: NIHMS915695-supplement-2.pdf [file NIHMS915695-supplement-2.pdf]

# Supplemental Figure 1

A

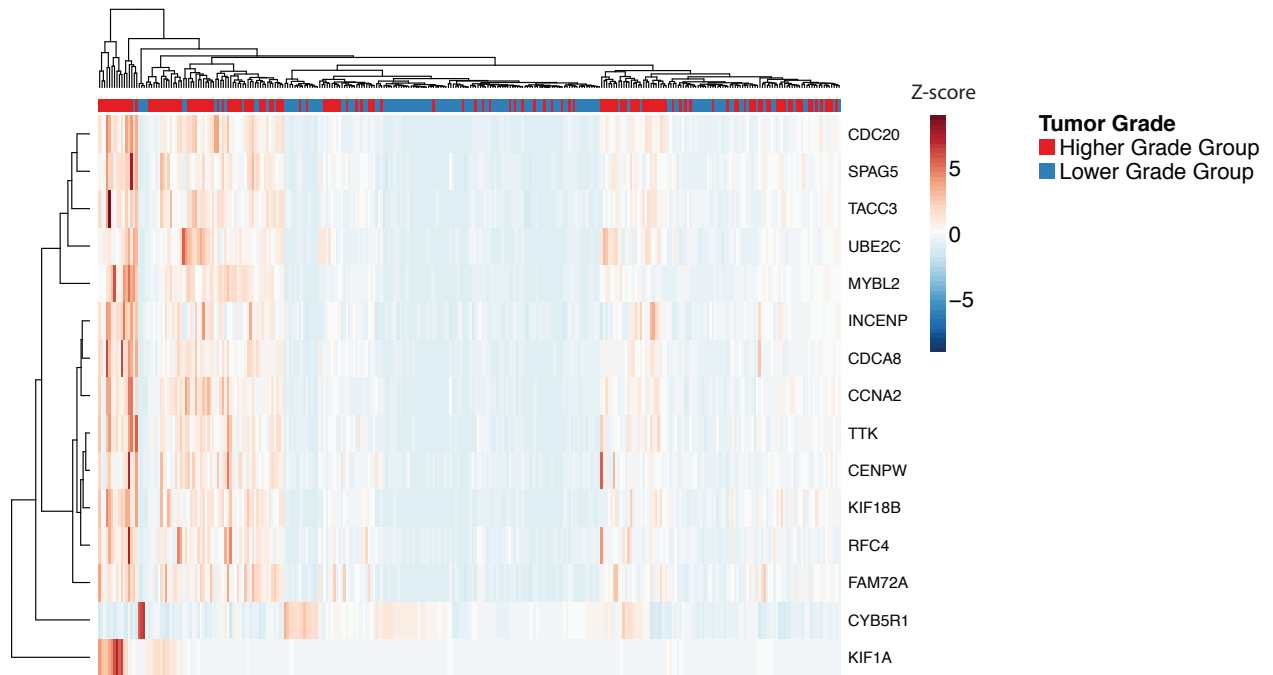

B

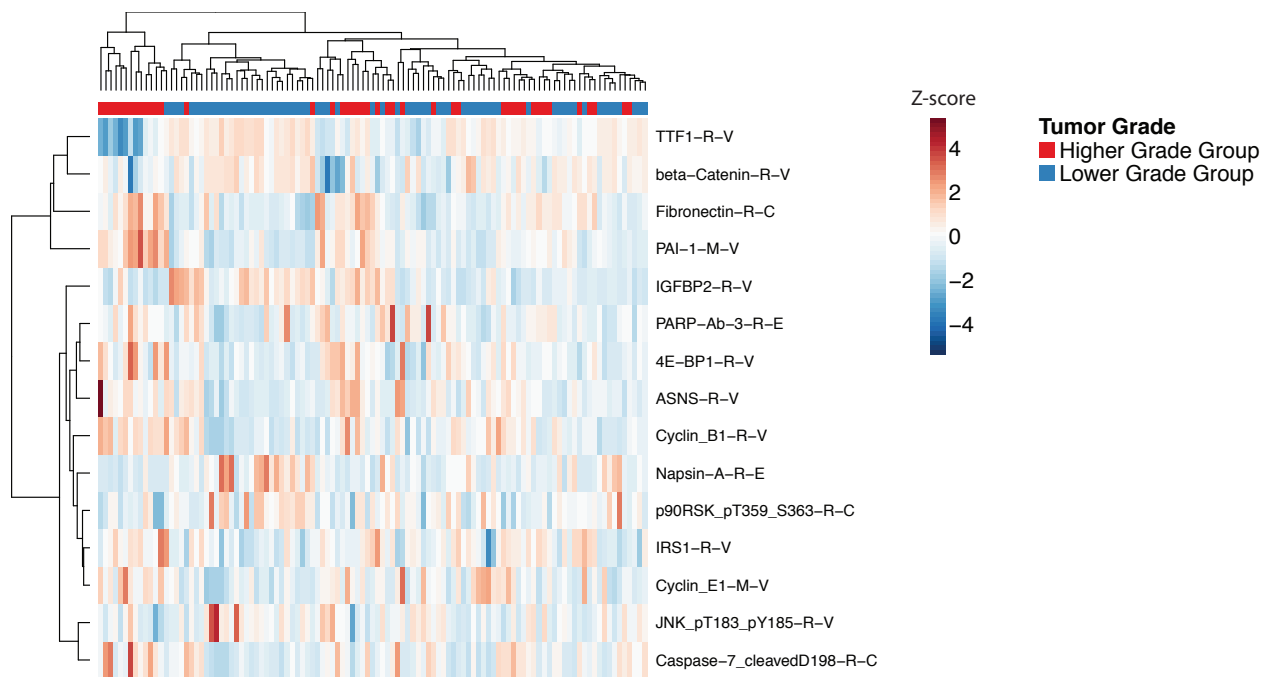

**Supplemental Figure 1: Related to Figure 2.** Heatmaps of gene expression or protein abundance associated with tumor differentiation status. (A) A heatmap showing the gene expression profiles associated with pathology grade. Patients were divided into a lower-grade group (with well or moderately differentiated tumor) and a higher-grade group (with poorly differentiated or moderate-to-poorly differentiated tumor). (B) A heatmap showing the protein abundance levels associated with pathology grade. Patients were divided into a lower-grade group and a higher-grade group as described above.

# Supplemental Figure 2

A

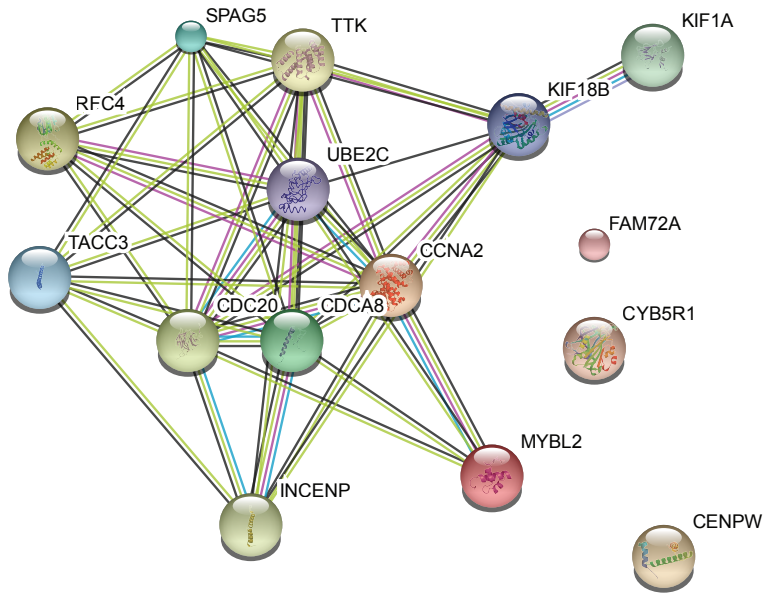

B

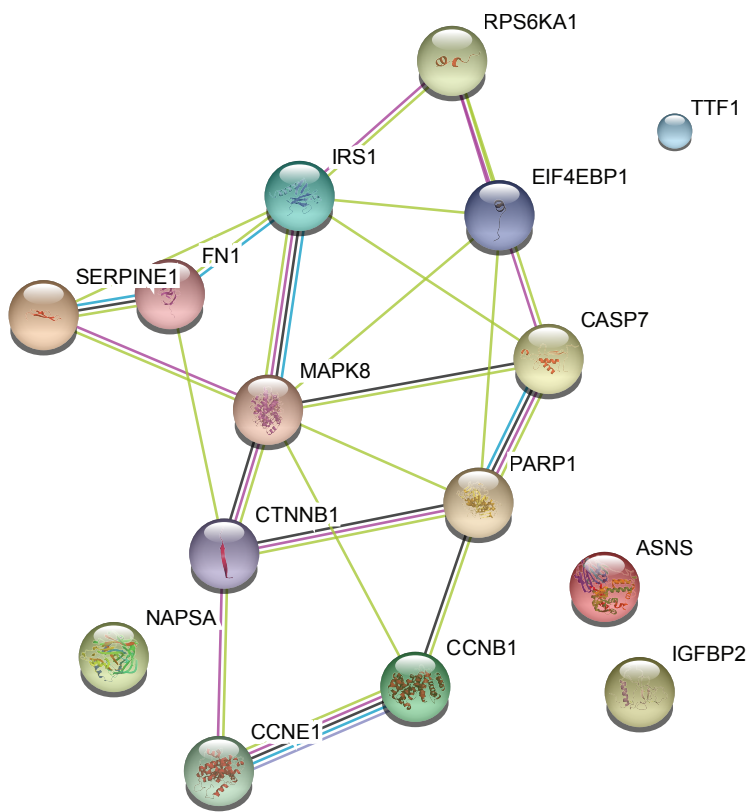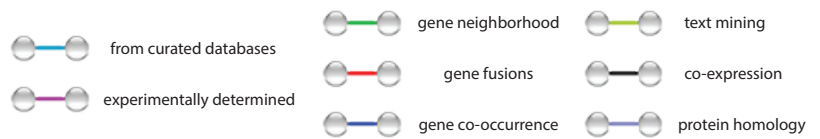

**Supplemental Figure 2: Related to Figure 2.** Transcriptomic and proteomic profiles are associated with patients' tumor grade. Both (A) transcriptomic and (B) proteomic features correlated with tumor grade formed tight interaction networks.

# Supplemental Figure 3

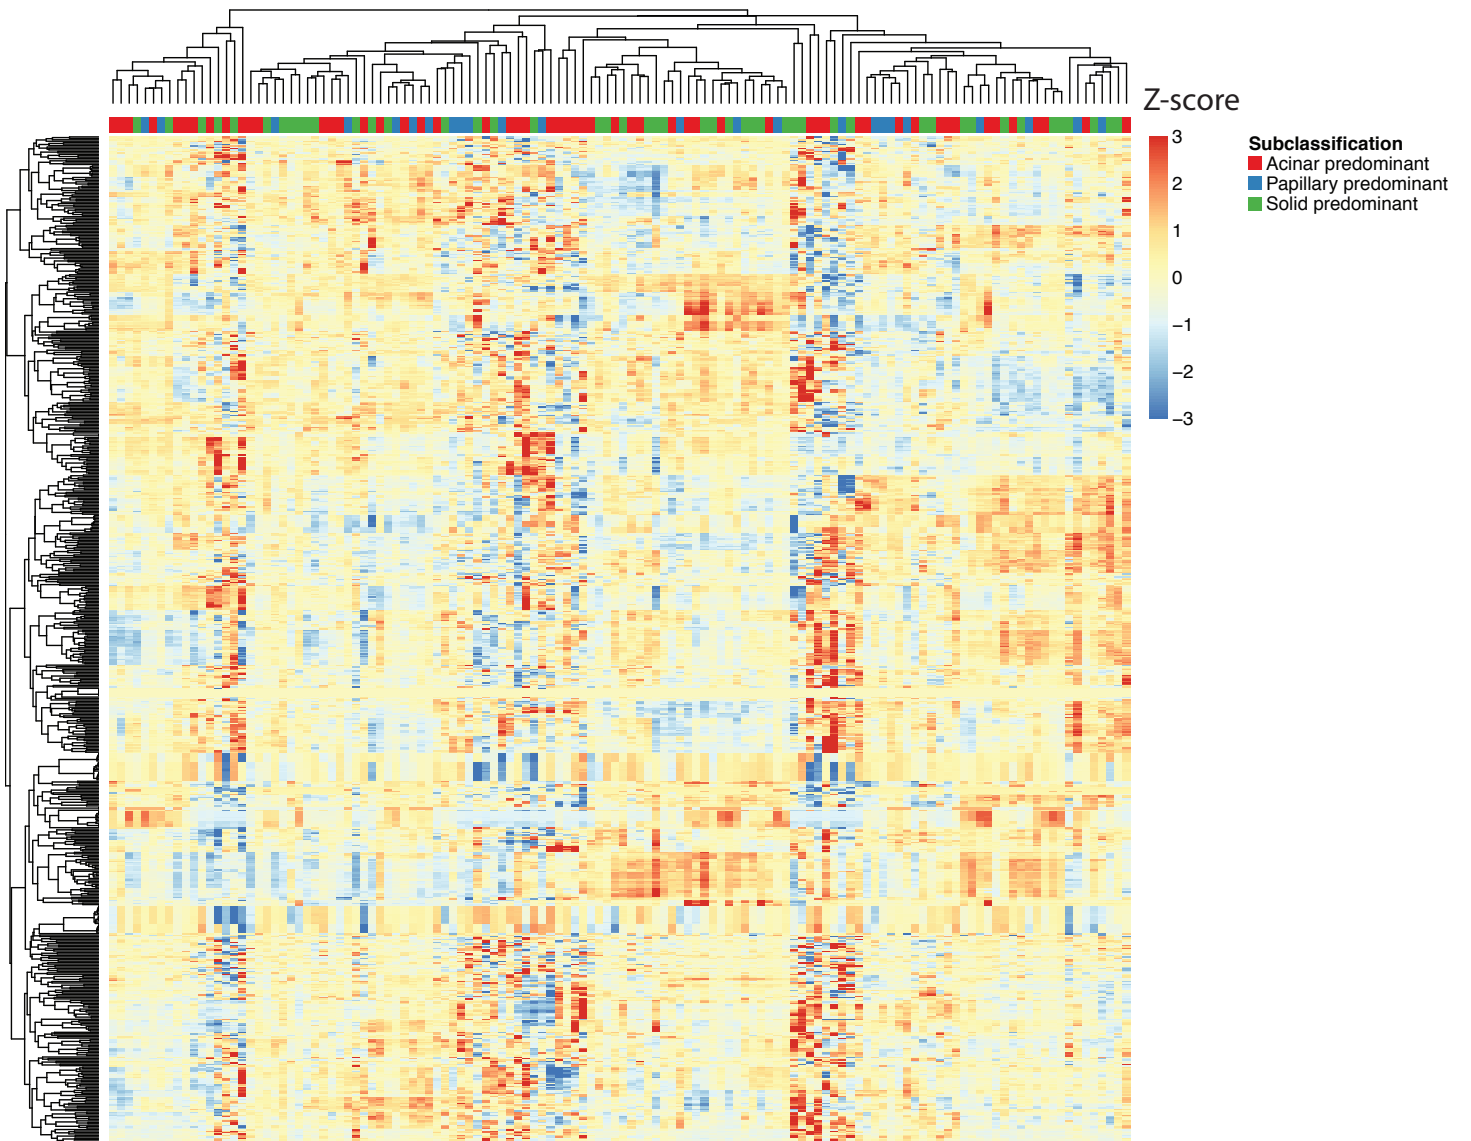

**Supplemental Figure 3: Related to Figure 2.** Clustering analysis of the quantitative histopathology image features. For better visualization, we selected three major lung adenocarcinoma sub-classifications that had more than 20 patients with available histopathology images.

# Supplemental Figure 4

A

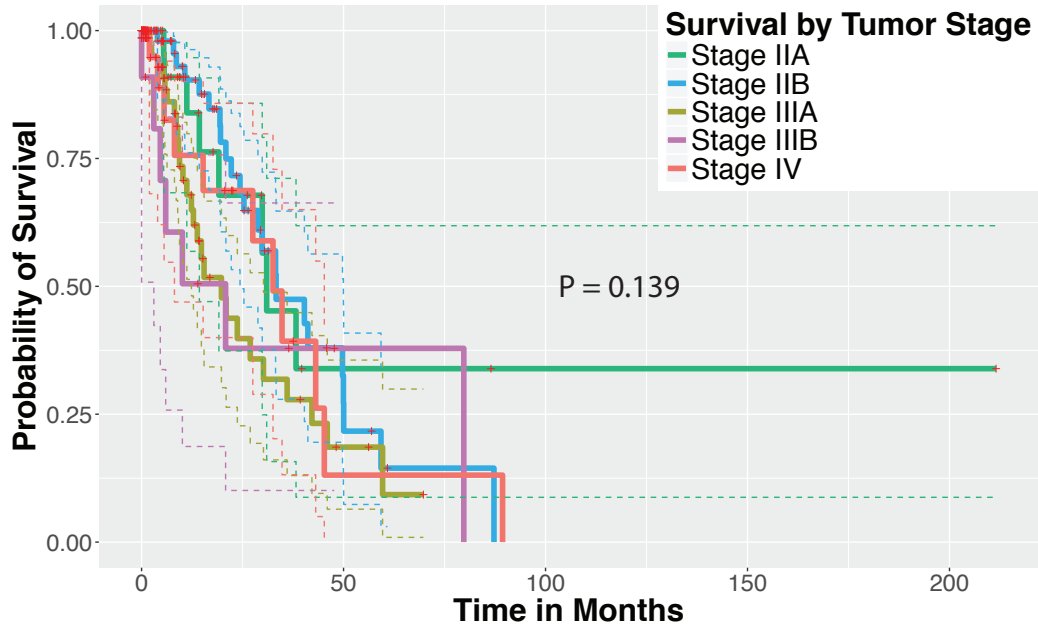

B

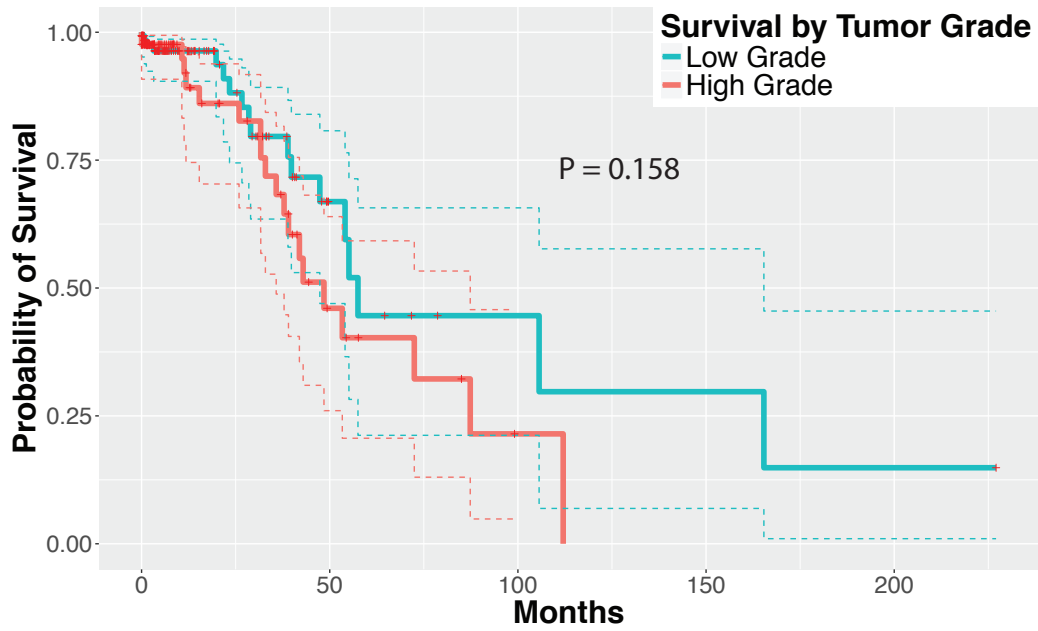

**Supplemental Figure 4: Related to Figure 3.** Additional survival prediction results using tumor stage and grade. Red asterisks indicated censored data. (A) Survival stratification of patients with stage II or higher lung adenocarcinoma. The differences in overall survival among lung adenocarcinoma patients with stage II or higher tumor was not significant in the TCGA cohort. Among stage IIa, IIb, IIIa, IIIb, and IV, the log-rank test P-value is 0.139. (B) Stage I lung adenocarcinoma patient survival stratified by binarized tumor grade (high-grade group versus low-grade group). Binarized grade alone could not predict patient survival reliably (log-rank test  $P = 0.158$ ).



**Supplemental Table 1: Related to Figure 1.** Patient characteristics of The Cancer Genome Atlas (TCGA) cohort.

| <b>Characteristics</b>                                          | <b>Summary</b>   |
|-----------------------------------------------------------------|------------------|
| <b>The Cancer Genome Atlas Cohort</b>                           | N=538            |
| Age                                                             | 66.0 ± 9.9 years |
| Number of tumor histopathology image series                     | N=831            |
| Number of histopathology image series of adjacent benign tissue | N=243            |
| Number of histopathology image tiles                            | N=5,739,972      |
| <b>Grade</b>                                                    |                  |
| Grade 1                                                         | 62 (11.5 %)      |
| Grade 1-2                                                       | 11 (2.0 %)       |
| Grade 2                                                         | 180 (33.5 %)     |
| Grade 2-3                                                       | 39 (7.2 %)       |
| Grade 3                                                         | 170 (31.6 %)     |
| Grade 4                                                         | 5 (0.9 %)        |
| Grade unavailable                                               | 71 (13.2 %)      |
| <b>Stage</b>                                                    |                  |
| Stage I                                                         | 254 (47.2 %)     |
| Stage II                                                        | 119 (22.1 %)     |
| Stage III                                                       | 81 (15.1 %)      |
| Stage IV                                                        | 25 (4.6 %)       |
| Stage unavailable                                               | 59 (11.0 %)      |
| <b>TP53 Mutation</b>                                            |                  |
| Mutation                                                        | 125 (23.2 %)     |
| No mutation                                                     | 105 (19.5 %)     |
| <b>BRAF Mutation</b>                                            |                  |
| Mutation with Known Clinical Significance                       | 16 (3.0 %)       |
| Mutation with Unknown Significance                              | 6 (1.1 %)        |
| No mutation                                                     | 497 (92.3 %)     |
| Data unavailable                                                | 19 (3.5 %)       |
| <b>EGFR Mutation</b>                                            |                  |
| Mutation with Known Clinical Significance                       | 22 (4.1 %)       |
| Mutation with Unknown Significance                              | 11 (2.0 %)       |
| No mutation                                                     | 486 (90.3 %)     |
| Data unavailable                                                | 19 (3.5 %)       |
| <b>MET Amplification</b>                                        |                  |
| Amplification                                                   | 17 (3.2 %)       |
| No amplification                                                | 498 (92.6 %)     |
| Data unavailable                                                | 23 (4.3 %)       |

**Supplemental Table 2: Related to Figure 1.** Patient characteristics of stage I adenocarcinoma patients of The Cancer Genome Atlas (TCGA) and the Mayo Clinic cohorts.

| <b>Characteristics</b>                                                                                | <b>Summary</b>    |
|-------------------------------------------------------------------------------------------------------|-------------------|
| <b>Stage I Adenocarcinoma Patients in TCGA with Available Histopathology and Gene Expression Data</b> | N = 222           |
| Age                                                                                                   | 66.8 ± 9.5 years  |
| Stage                                                                                                 |                   |
| Stage IA                                                                                              | 103 (46.4 %)      |
| Stage IB                                                                                              | 116 (52.3 %)      |
| Stage I, IA or IB unspecified                                                                         | 3 (1.35 %)        |
| Grade                                                                                                 |                   |
| Grade 1                                                                                               | 37 (16.7 %)       |
| Grade 1-2                                                                                             | 8 (3.60 %)        |
| Grade 2                                                                                               | 97 (43.7 %)       |
| Grade 2-3                                                                                             | 18 (8.11 %)       |
| Grade 3                                                                                               | 62 (27.9 %)       |
| Survival outcomes                                                                                     |                   |
| Alive                                                                                                 | 185 (83.3 %)      |
| Dead                                                                                                  | 37 (16.7 %)       |
| <b>Stage I Adenocarcinoma Patients in the Mayo Clinic Cohort</b>                                      | N = 27            |
| Age                                                                                                   | 66.1 ± 12.6 years |
| Stage                                                                                                 |                   |
| Stage IA                                                                                              | 10 (37.0%)        |
| Stage IB                                                                                              | 17 (63.0 %)       |
| Grade                                                                                                 |                   |
| Grade 1                                                                                               | 2 (7.4%)          |
| Grade 2                                                                                               | 18 (66.7%)        |
| Grade 3                                                                                               | 7 (25.9%)         |
| Survival outcomes                                                                                     |                   |
| Alive                                                                                                 | 20 (74.1 %)       |
| Dead                                                                                                  | 7 (25.9 %)        |

**Supplemental Table 3: Related to Figure 2.** Quantitative image features associated with TP53 mutation status.

| <b>Quantitative Image Features</b>                                           | <b>Raw P-values</b> | <b>Adjusted P-values</b> |
|------------------------------------------------------------------------------|---------------------|--------------------------|
| Median_Cytoplasm_Intensity_LowerQuartileIntensity_MaskedEWithoutOverlap      | 5.54E-04            | 4.18E-02                 |
| Median_Cytoplasm_Intensity_MeanIntensityEdge_MaskedEWithoutOverlap           | 9.41E-04            | 4.18E-02                 |
| Median_Cytoplasm_Intensity_MeanIntensity_MaskedEWithoutOverlap               | 8.41E-04            | 4.18E-02                 |
| Median_Cytoplasm_Intensity_MedianIntensity_MaskedEWithoutOverlap             | 8.41E-04            | 4.18E-02                 |
| Median_Cytoplasm_Intensity_MinIntensityEdge_MaskedEWithoutOverlap            | 1.47E-04            | 4.18E-02                 |
| Median_Cytoplasm_Intensity_MinIntensity_MaskedEWithoutOverlap                | 5.65E-04            | 4.18E-02                 |
| Median_Cytoplasm_RadialDistribution_RadialCV_MaskedEWithoutOverlap_3of4      | 1.02E-04            | 4.18E-02                 |
| Median_FilteredNuclei_Intensity_LowerQuartileIntensity_MaskedEWithoutOverlap | 7.20E-04            | 4.18E-02                 |
| Median_FilteredNuclei_Intensity_MeanIntensityEdge_MaskedEWithoutOverlap      | 9.61E-04            | 4.18E-02                 |
| Median_FilteredNuclei_Intensity_MeanIntensity_MaskedEWithoutOverlap          | 9.71E-04            | 4.18E-02                 |
| Median_FilteredNuclei_Intensity_MinIntensityEdge_MaskedEWithoutOverlap       | 1.93E-04            | 4.18E-02                 |
| Median_FilteredNuclei_Intensity_MinIntensity_MaskedEWithoutOverlap           | 3.45E-04            | 4.18E-02                 |
| Median_FilteredNuclei_RadialDistribution_RadialCV_MaskedEWithoutOverlap_3of4 | 2.61E-04            | 4.18E-02                 |
| Median_FilteredNuclei_Texture_AngularSecondMoment_MaskedHWithoutOverlap_3_0  | 6.69E-04            | 4.18E-02                 |
| Median_Nuclei_Intensity_IntegratedIntensityEdge_MaskedEWithoutOverlap        | 5.90E-04            | 4.18E-02                 |
| Median_Nuclei_Intensity_MinIntensityEdge_MaskedEWithoutOverlap               | 8.54E-04            | 4.18E-02                 |
| Median_FilteredNuclei_Texture_AngularSecondMoment_MaskedHWithoutOverlap_3_45 | 1.06E-03            | 4.31E-02                 |
| Median_Nuclei_Intensity_MeanIntensityEdge_MaskedEWithoutOverlap              | 1.15E-03            | 4.41E-02                 |
| Median_Cytoplasm_Intensity_UpperQuartileIntensity_MaskedEWithoutOverlap      | 1.35E-03            | 4.43E-02                 |
| Median_FilteredNuclei_Intensity_MedianIntensity_MaskedEWithoutOverlap        | 1.46E-03            | 4.43E-02                 |
| Median_FilteredNuclei_RadialDistribution_Ra                                  | 1.37E-03            | 4.43E-02                 |

|                                                                         |          |          |
|-------------------------------------------------------------------------|----------|----------|
| dialCV_MaskedEWithoutOverlap_4of4                                       |          |          |
| Median_FilteredNuclei_Texture_Entropy_MaskedHWithoutOverlap_3_135       | 1.46E-03 | 4.43E-02 |
| Median_Nuclei_Intensity_MinIntensity_MaskedEWithoutOverlap              | 1.48E-03 | 4.43E-02 |
| Median_Cytoplasm_RadialDistribution_RadialCV_MaskedEWithoutOverlap_4of4 | 1.60E-03 | 4.59E-02 |
| Median_Nuclei_Intensity_LowerQuartileIntensity_MaskedEWithoutOverlap    | 1.68E-03 | 4.63E-02 |
| Median_FilteredNuclei_Texture_Entropy_MaskedHWithoutOverlap_3_0         | 1.78E-03 | 4.72E-02 |
| Median_Nuclei_Intensity_MeanIntensity_MaskedEWithoutOverlap             | 1.94E-03 | 4.96E-02 |

**Supplemental Table 4: Related to Figure 2.** KEGG pathway enrichments for genes associated with TP53 mutation status in lung adenocarcinoma.

| <b>ID</b> | <b>Term</b>              | <b>Number of Genes</b> | <b>Adjusted P-value</b> |
|-----------|--------------------------|------------------------|-------------------------|
| 4110      | Cell cycle               | 29                     | 2.07E-10                |
| 3030      | DNA replication          | 11                     | 7.68E-05                |
| 3460      | Fanconi anemia pathway   | 11                     | 2.84E-03                |
| 3430      | Mismatch repair          | 7                      | 5.95E-03                |
| 3440      | Homologous recombination | 7                      | 1.45E-02                |
| 4115      | p53 signaling pathway    | 11                     | 1.63E-02                |

**Supplemental Table 5: Related to Figure 2.** Quantitative image features associated with lung adenocarcinoma sub-classifications and those achieved marginal significance in the association.

| <b>Quantitative Image Features</b>                                           | <b>Raw P-values</b> | <b>Adjusted P-values</b> |
|------------------------------------------------------------------------------|---------------------|--------------------------|
| Median_Nuclei_Texture_AngularSecondMoment_MaskedHWithoutOverlap_3_0          | 3.66E-05            | 2.54E-02                 |
| Median_FilteredNuclei_RadialDistribution_RadialCV_MaskedEWithoutOverlap_4of4 | 4.00E-04            | 5.37E-02                 |
| Median_Nuclei_RadialDistribution_RadialCV_MaskedEWithoutOverlap_4of4         | 3.54E-04            | 5.37E-02                 |
| Median_Nuclei_RadialDistribution_RadialCV_MaskedHWithoutOverlap_3of4         | 4.17E-04            | 5.37E-02                 |
| Median_Nuclei_Texture_AngularSecondMoment_MaskedHWithoutOverlap_3_135        | 4.64E-04            | 5.37E-02                 |
| Median_Nuclei_Texture_AngularSecondMoment_MaskedHWithoutOverlap_3_45         | 1.73E-04            | 5.37E-02                 |

**Supplemental Table 6: Related to Figure 2.** Quantitative image features associated with purity of lung adenocarcinoma tissue.

| <b>Quantitative Image Features</b>                                              | <b>Raw P-values</b> | <b>Adjusted P-values</b> |
|---------------------------------------------------------------------------------|---------------------|--------------------------|
| Median_Nuclei_Texture_AngularSecondMoment_MaskedHWithoutOverlap_3_135           | 5.11E-05            | 1.76E-02                 |
| Median_Nuclei_Texture_InverseDifferenceMoment_MaskedHWithoutOverlap_3_135       | 2.83E-05            | 1.76E-02                 |
| Median_FilteredNuclei_Texture_Contrast_MaskedEWithoutOverlap_3_0                | 1.41E-04            | 1.83E-02                 |
| Median_FilteredNuclei_Texture_DifferenceEntropy_MaskedEWithoutOverlap_3_0       | 1.86E-04            | 1.83E-02                 |
| Median_FilteredNuclei_Texture_DifferenceVariance_MaskedEWithoutOverlap_3_45     | 1.15E-04            | 1.83E-02                 |
| Median_Nuclei_Texture_AngularSecondMoment_MaskedHWithoutOverlap_3_90            | 1.44E-04            | 1.83E-02                 |
| Median_Nuclei_Texture_Entropy_MaskedHWithoutOverlap_3_90                        | 1.86E-04            | 1.83E-02                 |
| Median_FilteredNuclei_Texture_AngularSecondMoment_MaskedHWithoutOverlap_3_0     | 3.03E-04            | 2.11E-02                 |
| Median_Nuclei_Texture_AngularSecondMoment_MaskedHWithoutOverlap_3_45            | 2.77E-04            | 2.11E-02                 |
| Median_Nuclei_Texture_Entropy_MaskedHWithoutOverlap_3_135                       | 3.06E-04            | 2.11E-02                 |
| Median_FilteredNuclei_Texture_InverseDifferenceMoment_MaskedEWithoutOverlap_3_0 | 3.99E-04            | 2.28E-02                 |
| Median_Nuclei_AreaShape_Solidity                                                | 3.86E-04            | 2.28E-02                 |
| Median_Nuclei_Texture_AngularSecondMoment_MaskedHWithoutOverlap_3_0             | 4.31E-04            | 2.28E-02                 |
| Median_FilteredNuclei_Texture_DifferenceEntropy_MaskedEWithoutOverlap_3_45      | 4.75E-04            | 2.34E-02                 |
| Median_Cytoplasm_RadialDistribution_FracAttD_MaskedEWithoutOverlap_1of4         | 7.14E-04            | 2.50E-02                 |
| Median_FilteredNuclei_AreaShape_Zernike_5_3                                     | 9.56E-04            | 2.50E-02                 |
| Median_FilteredNuclei_Texture_AngularSecondMoment_MaskedHWithoutOverlap_3_135   | 6.63E-04            | 2.50E-02                 |
| Median_FilteredNuclei_Texture_AngularSecondMoment_MaskedHWithoutOverlap_3_90    | 7.60E-04            | 2.50E-02                 |
| Median_FilteredNuclei_Texture_Contrast_MaskedEWithoutOverlap_3_45               | 9.76E-04            | 2.50E-02                 |
| Median_FilteredNuclei_Texture_Contrast_MaskedEWithoutOverlap_3_90               | 8.71E-04            | 2.50E-02                 |
| Median_FilteredNuclei_Texture_Correlation_MaskedEWithoutOverlap_3_0             | 9.66E-04            | 2.50E-02                 |

|                                                                                    |          |          |
|------------------------------------------------------------------------------------|----------|----------|
| Median_FilteredNuclei_Texture_Entropy_MaskedHWWithoutOverlap_3_0                   | 8.80E-04 | 2.50E-02 |
| Median_FilteredNuclei_Texture_InverseDifferenceMoment_MaskedHWWithoutOverlap_3_135 | 1.02E-03 | 2.50E-02 |
| Median_Nuclei_AreaShape_Extent                                                     | 7.77E-04 | 2.50E-02 |
| Median_Nuclei_AreaShape_FormFactor                                                 | 7.68E-04 | 2.50E-02 |
| Median_Nuclei_RadialDistribution_RadialCV_MaskedHWWithoutOverlap_2of4              | 9.86E-04 | 2.50E-02 |
| Median_Nuclei_Texture_Entropy_MaskedHWWithoutOverlap_3_45                          | 6.56E-04 | 2.50E-02 |
| Median_Nuclei_Texture_InverseDifferenceMoment_MaskedHWWithoutOverlap_3_0           | 9.66E-04 | 2.50E-02 |
| Median_FilteredNuclei_Texture_Entropy_MaskedHWWithoutOverlap_3_90                  | 1.39E-03 | 3.31E-02 |
| Median_FilteredNuclei_Texture_DifferenceEntropy_MaskedHWWithoutOverlap_3_45        | 1.48E-03 | 3.40E-02 |
| Median_FilteredNuclei_Texture_DifferenceEntropy_MaskedHWWithoutOverlap_3_135       | 1.70E-03 | 3.66E-02 |
| Median_Nuclei_Texture_DifferenceEntropy_MaskedHWWithoutOverlap_3_135               | 1.68E-03 | 3.66E-02 |
| Median_FilteredNuclei_Texture_Contrast_MaskedHWWithoutOverlap_3_135                | 1.84E-03 | 3.70E-02 |
| Median_FilteredNuclei_Texture_DifferenceVariance_MaskedEWWithoutOverlap_3_0        | 1.90E-03 | 3.70E-02 |
| Median_Nuclei_Texture_Entropy_MaskedHWWithoutOverlap_3_0                           | 1.79E-03 | 3.70E-02 |
| Median_Nuclei_Texture_InverseDifferenceMoment_MaskedHWWithoutOverlap_3_45          | 1.93E-03 | 3.70E-02 |
| Median_FilteredNuclei_AreaShape_Solidity                                           | 2.21E-03 | 3.91E-02 |
| Median_FilteredNuclei_Texture_AngularSecondMoment_MaskedHWWithoutOverlap_3_45      | 2.17E-03 | 3.91E-02 |
| Median_FilteredNuclei_Texture_Correlation_MaskedEWWithoutOverlap_3_45              | 2.11E-03 | 3.91E-02 |
| Median_FilteredNuclei_Texture_DifferenceEntropy_MaskedHWWithoutOverlap_3_0         | 2.44E-03 | 4.00E-02 |
| Median_FilteredNuclei_Texture_InverseDifferenceMoment_MaskedEWWithoutOverlap_3_90  | 2.39E-03 | 4.00E-02 |
| Median_Nuclei_Texture_Contrast_MaskedHWWithoutOverlap_3_135                        | 2.32E-03 | 4.00E-02 |
| Median_FilteredNuclei_Texture_Entropy_MaskedHWWithoutOverlap_3_135                 | 2.63E-03 | 4.12E-02 |
| Median_Nuclei_Texture_Contrast_MaskedHWWithoutOverlap_3_45                         | 2.63E-03 | 4.12E-02 |
| Median_FilteredNuclei_RadialDistribution_Fr                                        | 2.88E-03 | 4.31E-02 |



|                                                                                   |          |          |
|-----------------------------------------------------------------------------------|----------|----------|
| acAtD_MaskedEWithoutOverlap_2of4                                                  |          |          |
| Median_Nuclei_RadialDistribution_FracAtD_MaskedEWithoutOverlap_2of4               | 2.87E-03 | 4.31E-02 |
| Median_FilteredNuclei_Texture_Correlation_MaskedEWithoutOverlap_3_135             | 2.95E-03 | 4.32E-02 |
| Median_Cytoplasm_Texture_SumEntropy_MaskedEWithoutOverlap_3_90                    | 3.30E-03 | 4.33E-02 |
| Median_FilteredNuclei_AreaShape_Zernike_9_7                                       | 3.18E-03 | 4.33E-02 |
| Median_FilteredNuclei_Texture_DifferenceEntropy_MaskedEWithoutOverlap_3_90        | 3.36E-03 | 4.33E-02 |
| Median_FilteredNuclei_Texture_DifferenceVariance_MaskedEWithoutOverlap_3_90       | 3.12E-03 | 4.33E-02 |
| Median_FilteredNuclei_Texture_DifferenceVariance_MaskedHWithoutOverlap_3_45       | 3.40E-03 | 4.33E-02 |
| Median_FilteredNuclei_Texture_InfoMeas1_MaskedEWithoutOverlap_3_0                 | 3.18E-03 | 4.33E-02 |
| Median_Nuclei_RadialDistribution_FracAtD_MaskedEWithoutOverlap_3of4               | 3.27E-03 | 4.33E-02 |
| Median_Nuclei_Texture_DifferenceEntropy_MaskedHWithoutOverlap_3_45                | 3.49E-03 | 4.37E-02 |
| Median_FilteredNuclei_Texture_DifferenceEntropy_MaskedEWithoutOverlap_3_135       | 3.59E-03 | 4.42E-02 |
| Median_Cytoplasm_Texture_SumEntropy_MaskedEWithoutOverlap_3_135                   | 4.01E-03 | 4.65E-02 |
| Median_FilteredNuclei_Texture_Contrast_MaskedHWithoutOverlap_3_45                 | 3.87E-03 | 4.65E-02 |
| Median_Nuclei_RadialDistribution_FracAtD_MaskedEWithoutOverlap_4of4               | 4.05E-03 | 4.65E-02 |
| Median_Nuclei_Texture_InverseDifferenceMoment_MaskedHWithoutOverlap_3_90          | 3.94E-03 | 4.65E-02 |
| Median_Cytoplasm_Texture_SumVariance_MaskedEWithoutOverlap_3_90                   | 4.16E-03 | 4.67E-02 |
| Median_FilteredNuclei_Texture_DifferenceVariance_MaskedEWithoutOverlap_3_135      | 4.20E-03 | 4.67E-02 |
| Median_FilteredNuclei_AreaShape_FormFactor                                        | 4.56E-03 | 4.83E-02 |
| Median_FilteredNuclei_Texture_InverseDifferenceMoment_MaskedEWithoutOverlap_3_135 | 4.56E-03 | 4.83E-02 |
| Median_FilteredNuclei_Texture_InverseDifferenceMoment_MaskedHWithoutOverlap_3_0   | 4.56E-03 | 4.83E-02 |
| Median_FilteredNuclei_RadialDistribution_FracAtD_MaskedEWithoutOverlap_4of4       | 4.85E-03 | 4.92E-02 |
| Median_Nuclei_Texture_SumAverage_Masked                                           | 4.77E-03 | 4.92E-02 |

|                                                                  |          |          |
|------------------------------------------------------------------|----------|----------|
| EWithoutOverlap_3_0                                              |          |          |
| Median_Nuclei_Texture_SumAverage_Masked<br>EWithoutOverlap_3_135 | 4.81E-03 | 4.92E-02 |
